# Supplementary material
Source: PubMed Central journal article supplement (PMC7907257)
Supplement: NIHMS1622042-supplement-2.pdf [file NIHMS1622042-supplement-2.pdf]

**Fig. S2**

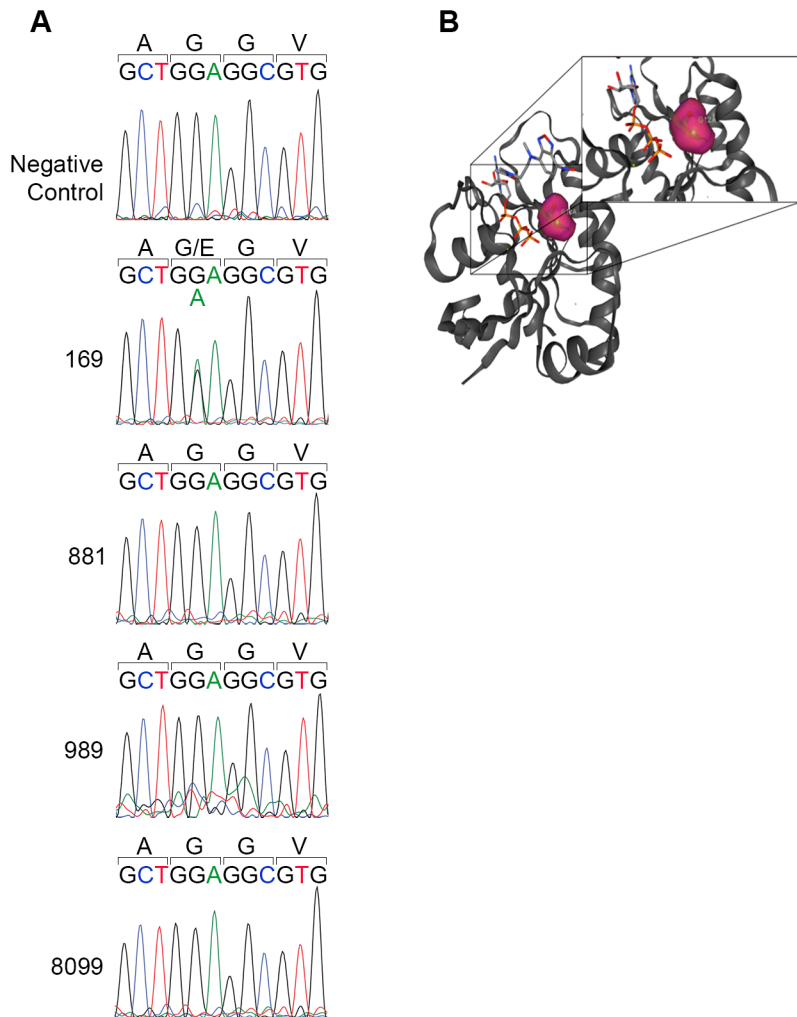

**Fig. S2 A.** *HRas* sequencing. Sanger sequencing of exons 2 (codons 12 and 13) of *HRas* was performed. Shown are selected representative chromatograms from *Nf1* mutant tumor cells analyzed. A mutation in codon 12 of exon 2 of *HRas* was identified in the cell line 169. **B.** Structure of HRAS in complex with GTP depicting the position of the mutated amino acid G12A.
