# Supplementary material
Source: PubMed Central journal article supplement (PMC7907257)
Supplement: NIHMS1622042-supplement-5.pdf [file NIHMS1622042-supplement-5.pdf]

# Fig. S5

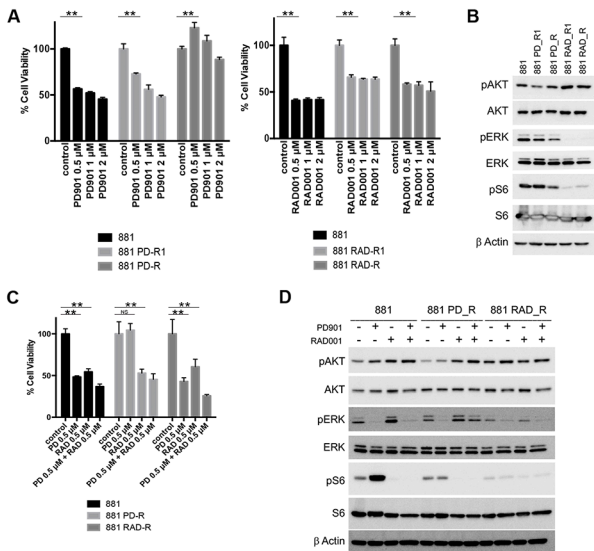

**Fig. S5** Drug resistant 881 *Nf1* mutant cells. **A**. 881 parental cells were continuously exposed to increasing concentrations (from 25 nM to 500 nM) of PD901 or RAD001. Two sets of resistant cell lines were established for each drug, one resistant to 100 nM (881 PD\_R1, 881 RAD\_R1) and one resistant to 500 nM (881 PD\_R, 881 RAD\_R). Acquired resistance was confirmed by MTS proliferation assay by comparing the growth of parental and resistant cell lines to increasing drug concentrations for 72 hours (\* $P < 0.05$ ; \*\* $P < 0.01$ ; ns, not significant). **B**. *Ras* pathway activation in drug resistant cell lines under basal conditions was evaluated by Western blot analysis. Total and phosphorylated AKT (S473), S6 Ribosomal Protein (Ser235/236) and p44/42 MAPK (ERK1/2) (Thr202/Tyr204) were assessed.  $\beta$  actin was used as loading control. **C**. Sensitivity to 0.5  $\mu$ M PD901, 0.5  $\mu$ M RAD001 or the combination was assessed in parental and resistant cell lines by MTS proliferation assay after 72 hours of drug exposure (\* $P < 0.05$ ; \*\* $P < 0.01$ ; ns, not significant). **D**. Western blot analysis was performed to evaluate phosphorylation responses of *Ras* pathway effectors to single or combinatorial drug treatment.
