# Supplementary material
Source: PubMed Central journal article supplement (PMC7907257)
Supplement: NIHMS1622042-supplement-6.pdf [file NIHMS1622042-supplement-6.pdf]

# Fig. S6

**A**

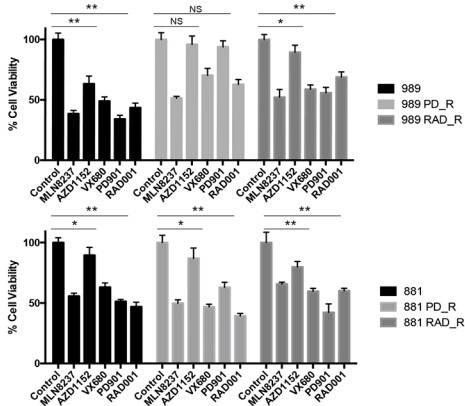

**B**

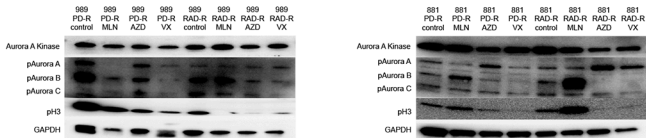

**Fig. S6** *Nf1* mutant tumor cells respond to Aurora Kinase inhibition. **A.** Cell viability of parental and drug resistant cell lines treated with Aurora inhibitors MLN8237, AZD1152 or VX680 (PD901 and RAD001 shown for comparison) was measured by MTS assay after 72 hours of exposure (\* $P < 0.05$ ; \*\* $P < 0.01$ ; NS, not significant). **B.** Western blot analysis was performed to evaluate Aurora A, B and C phosphorylation in response to Aurora inhibitors MLN8237, AZD1152 or VX680.
