# Supplementary material
Source: PubMed Central journal article supplement (PMC7907257)
Supplement: NIHMS1622042-supplement-8.pdf [file NIHMS1622042-supplement-8.pdf]

Fig. S8

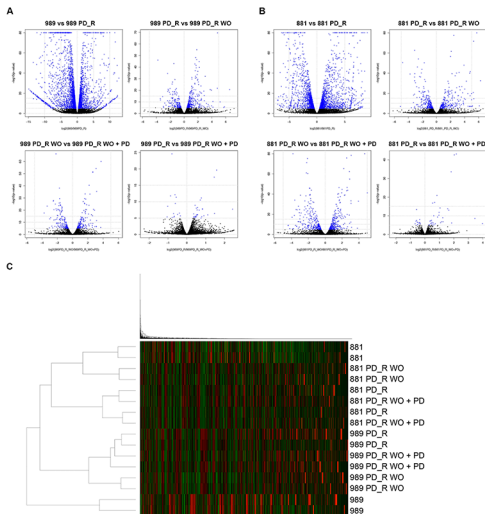

**Fig. S8** Transcriptional comparison of post-drug washout cells. A-B. Volcano plot representation of differential expression analysis of genes in parental, drug-resistant, and washout cell lines. Blue points mark the genes with significantly increased or decreased expression respectively compared samples. The log2fold-changes in expression are plotted on the x-axis and the log10p-value of the differential expression is plotted on the y-axis. C. Heat map depicting unsupervised clustering analyzed of transcriptomes of drug resistant cell lines after washout of PD901.
